# Supplementary material for: Zeolite-encapsulated copper(ii) complexes with NNO-tridentate Schiff base ligands: catalytic activity for methylene blue (MB) degradation under near neutral conditions
Source: Royal Society of Chemistry journal article supplement (doi:10.1039/d3dt03694d), 2023-12-12
Supplement: d3dt03694d1.pdf [file d3dt03694d1.pdf]

## Electronic Supplementary Information

### **Zeolite encapsulated copper(II) complexes with NNO-tridentate Schiff base ligands: catalytic activity towards methylene blue (MB) degradation in a near neutral condition**

Shuyu Li<sup>a,\*</sup>, Die Wu<sup>a</sup>, Xiting Wang<sup>a</sup>, Jiaying Xiong<sup>a</sup>, Li Zhang<sup>b,\*</sup>, Kaili Ma<sup>c,\*</sup>

<sup>a</sup> *Key Laboratory of Pollution Control Chemistry and Environmental Functional Materials for Qinghai-Tibet Plateau of the National Ethnic Affairs Commission, School of Chemistry and Environment, Southwest Minzu University, Chengdu 610041, Sichuan, China*

<sup>b</sup> *School of Electronic Engineering, Guangxi University of Science and Technology, Liuzhou 545000, Liuzhou 545000, Guangxi, China*

<sup>c</sup> *Analysis and Testing Center, Southeast University, Nanjing 211189, Jiangsu, China.*

<sup>d</sup> *Key Laboratory of General Chemistry of the National Ethnic Affairs Commission, School of Chemistry and Environment, Southwest Minzu University, Chengdu 610041, Sichuan, China*

\*Corresponding authors:

*E-mail address:* LSYJY1213@163.com (S. Li), zhangli@gxust.edu.cn (L. Zhang), makaili199181@163.com (K. Ma)

## Electronic Supplementary Information

### Contents

#### Characterization

1. Scheme S1. Synthesis of salen Ligand L<sup>1</sup>-H, L<sup>2</sup>-H and L<sup>3</sup>-H.
2. Figure S1. <sup>1</sup>H NMR of ligand L<sup>1</sup>-H in CDCl<sub>3</sub>.
3. Figure S2. <sup>1</sup>H NMR of ligand L<sup>2</sup>-H in CDCl<sub>3</sub>.
4. Figure S3. <sup>1</sup>H NMR of ligand L<sup>3</sup>-H in CDCl<sub>3</sub>.
5. Table S1: Assignments in <sup>1</sup>H NMR data of NNO-type Schiff bases L<sup>n</sup>-H.
6. Scheme S2. Synthesis of Copper salen complexes L<sup>1</sup>Cu(OAc), L<sup>2</sup>Cu(OAc) and L<sup>3</sup>Cu(OAc).
7. Figure S4. Mass spectra of L<sup>1</sup>Cu(OAc), L<sup>2</sup>Cu(OAc) and L<sup>3</sup>Cu(OAc).
8. Scheme S3. Synthesis of zeolite encapsulated Copper salen complexes L<sup>1</sup>Cu(OAc)-Y, L<sup>2</sup>Cu(OAc)-Y and L<sup>3</sup>Cu(OAc)-Y.
9. Figure S5. EDX spectra of Cu-Y, L<sup>1</sup>Cu(OAc)-Y, L<sup>2</sup>Cu(OAc)-Y, L<sup>3</sup>Cu(OAc)-Y and EDX mapping of L<sup>1</sup>Cu(OAc)-Y, L<sup>2</sup>Cu(OAc)-Y and L<sup>3</sup>Cu(OAc)-Y.
10. Figure S6. ORTEP drawing of complex L<sup>2</sup>Cu(OAc).
11. Figure S7. FTIR spectra of (a) L<sup>1</sup>-H, (b) L<sup>2</sup>-H and (c) L<sup>3</sup>-H.
12. Figure S8. FTIR spectra of (a) L<sup>1</sup>Cu(OAc), (b) L<sup>2</sup>Cu(OAc) and (c) L<sup>3</sup>Cu(OAc).
13. Table S2: FTIR spectral data (in cm<sup>-1</sup>) for Ligands.
14. Figure S9. SEM images after Soxhlet extraction of L<sup>1</sup>Cu(OAc)-Y and L<sup>2</sup>Cu(OAc)-Y.
15. Figure S10. BET isotherms of NaY.
16. Figure S11. High resolution XPS spectra of C (1s), N (1s) and O (1s) for L<sup>1</sup>Cu(OAc).
17. Figure S12. High resolution XPS spectra of C (1s), N (1s), O (1s), Al (2p) and Si (2p) for L<sup>1</sup>Cu(OAc)-Y.

18. **Figure S13. High resolution XPS spectra of C (1s), N (1s), O (1s), Al (2p) and Si (2p) for L<sup>2</sup>Cu(OAc)-Y.**
19. **Figure S14. High resolution XPS spectra of C (1s), N (1s), O (1s), Al (2p), Si (2p) and Cu (2p) for L<sup>3</sup>Cu(OAc)-Y.**
20. **Figure S15. Solution UV-vis spectra of (A) L<sup>1</sup>-H and L<sup>1</sup>Cu(OAc), (B) L<sup>2</sup>-H and L<sup>2</sup>Cu(OAc), (C) L<sup>3</sup>-H and L<sup>3</sup>Cu(OAc).**
21. **Figure S16. Molecular dimension of free Schiff-complexes L<sup>n</sup>Cu(OAc) after optimization**
22. **Figure S17. Effects of initial pH on MB degradation.**
23. **Figure S18. Effects of H<sub>2</sub>O<sub>2</sub> concentration on MB degradation.**
24. **Figure S19. Effects of amount of catalyst on MB degradation.**
25. **Figure S20. Effects of initial MB concentration on MB degradation.**
26. **Table S3: Comparison of the catalytic performance of L<sup>3</sup>Cu(OAc)-Y with some other catalysts.**
27. **Figure S21. FT-IR spectra of fresh and used complexes in free states.**
28. **Figure S22. FT-IR spectra of fresh and used complexes in encapsulated states.**
29. **Figure S23. ESI-MS spectra of MB degradation after 120 min.**

## Characterization

NMR spectra were obtained on a Bruker 400MHz NMR spectrometer. FT-IR spectra were investigated on the Thermo-Nicolet IR200 in the range of 500-4000  $\text{cm}^{-1}$  using KBr as a reference. The SEM-EDX analysis has been performed by using ZEISS Sigma 300 scanning electron microscope. Powder XRD patterns of the samples were investigated on the Persee XD-6 diffractometer using Cu-K $\alpha$  radiation ( $\lambda = 1.542 \text{ \AA}$ ). X-ray crystal structures were characterized by using a Bruker D8 VENTURE detector. The content of copper was analyzed using inductive coupled plasma mass spectrometry after the sample was treated with nitric acid. TGA analyses were studied from 40 to 800  $^{\circ}\text{C}$  at a heating rate of 10  $^{\circ}\text{C}\cdot\text{min}^{-1}$  on a NETZSCH thermoanalyzer TG209 F3 under an atmosphere of  $\text{N}_2$ . XPS analysis was performed on a PreVac XPS-2 system by using Al K $\alpha$  X-ray source (1486.6 eV). All binding energies of the samples were calibrated with the adventitious C 1s peak at 284.6 eV to compensate the charging effect. The BET surface area and pore volume have been characterized using nitrogen sorption data at 77 K with a volumetric adsorption setup (Micromeritics ASAP 2460). The electronic spectra in the solid state were obtained using Shimadzu UV-3600 plus spectrometer. UV-vis absorption spectra have been obtained on the Persee TU-1950 spectrophotometer for liquid samples. High-performance liquid chromatogram (HPLC) analysis was carried out on Waters 2695, and corresponding electrospray ionization mass spectrometry (ESI-MS) was recorded on Waters ZQ2000. High-resolution mass spectra (HRMS) were recorded on a Waters Xevo G2-XS QToF spectrometer (ESI+). Elemental analysis measurements were conducted on Elementar UNICUBE elemental analyzer.

1. Scheme S1:

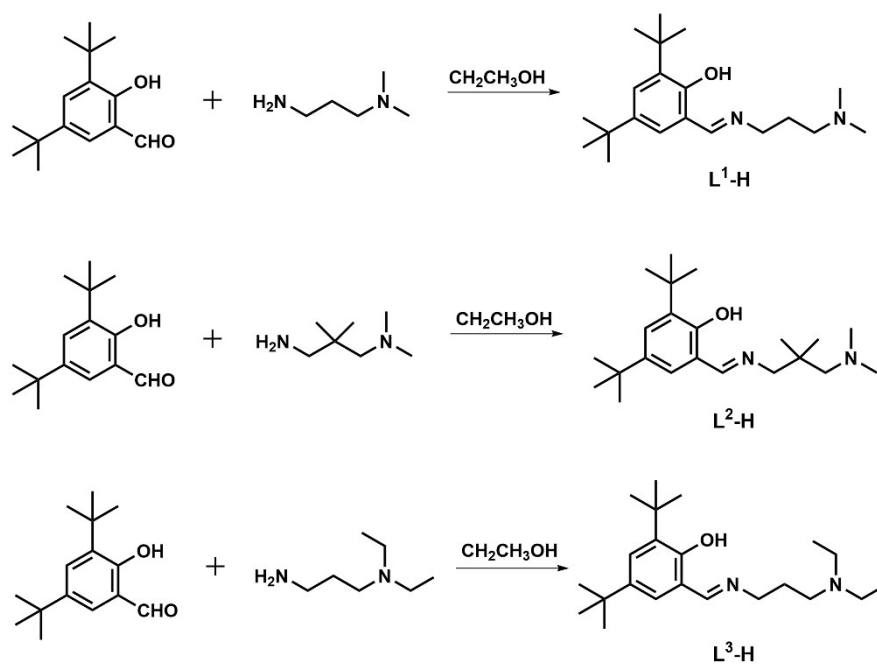

Scheme S1. Synthesis of Schiff Ligand L<sup>1</sup>-H, L<sup>2</sup>-H and L<sup>3</sup>-H.

2. Figure S1:

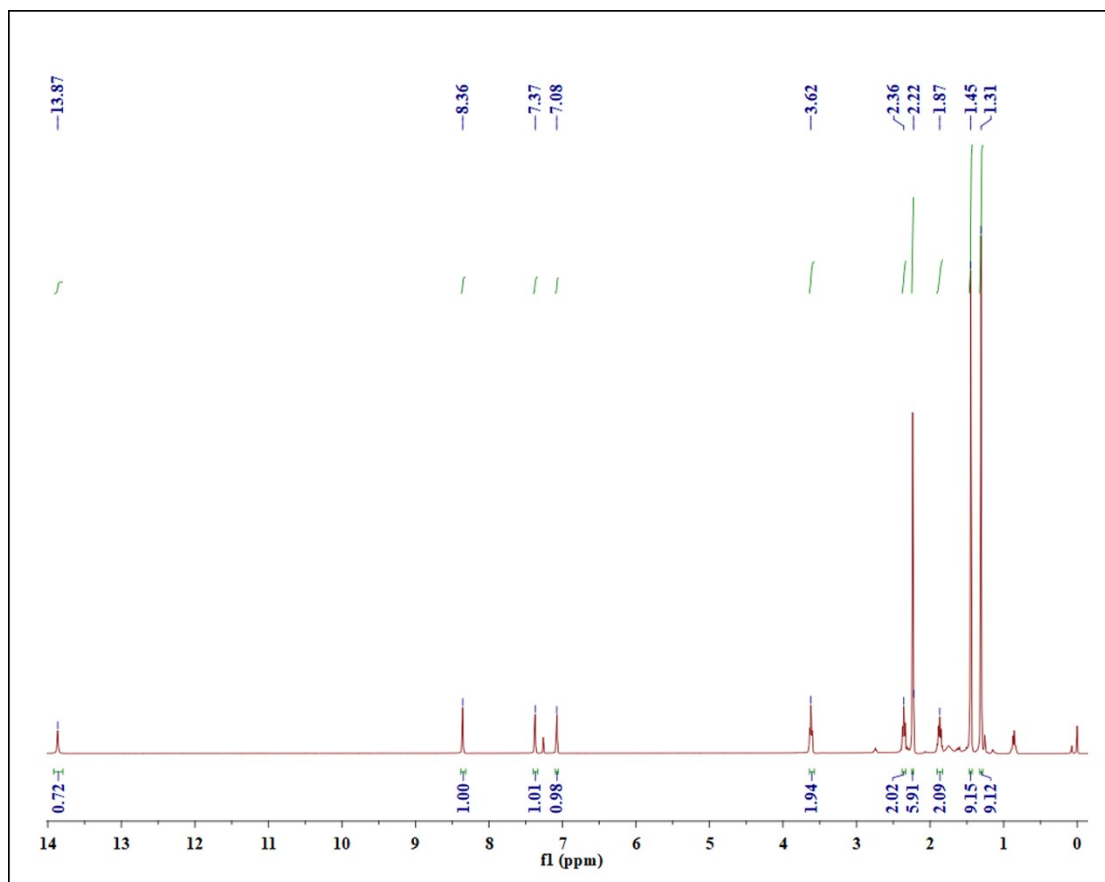

Figure S1. <sup>1</sup>H NMR of ligand L<sup>1</sup>-H in CDCl<sub>3</sub>.

3. Figure S2:

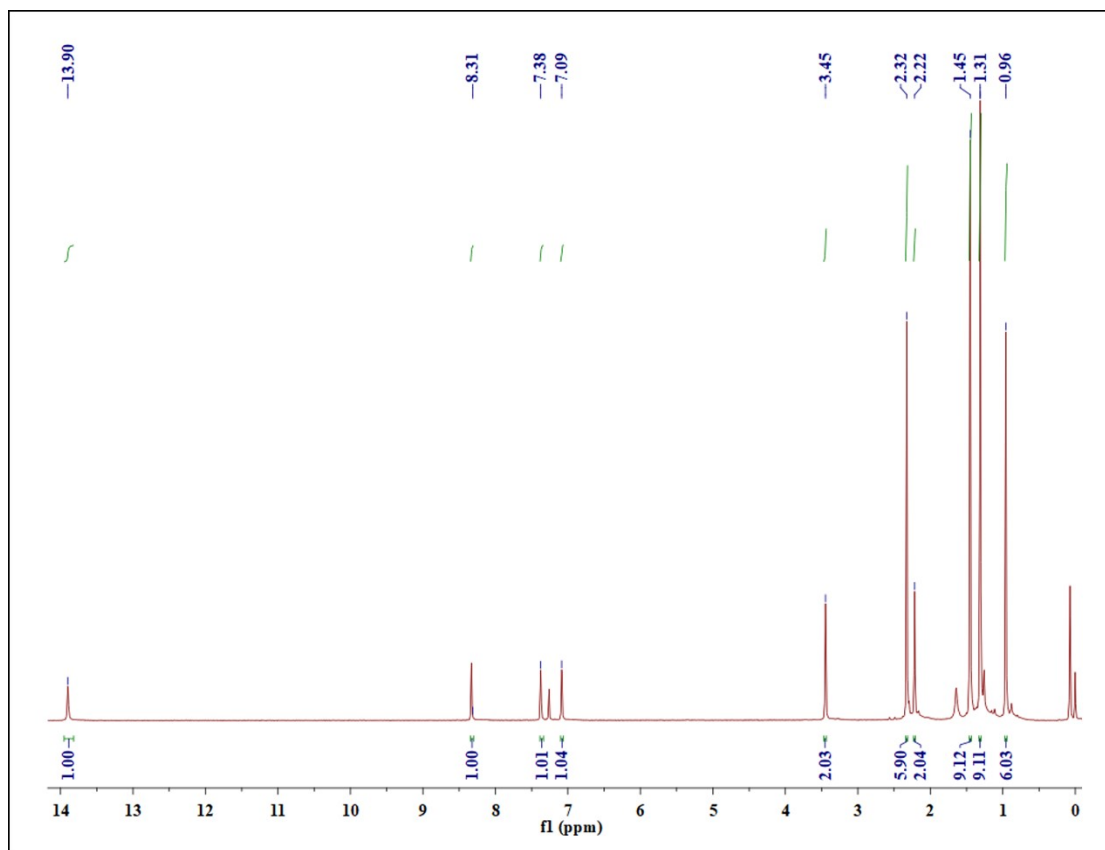

Figure S2. <sup>1</sup>H NMR of ligand L<sup>2</sup>-H in CDCl<sub>3</sub>.

#### 4. Figure S3:

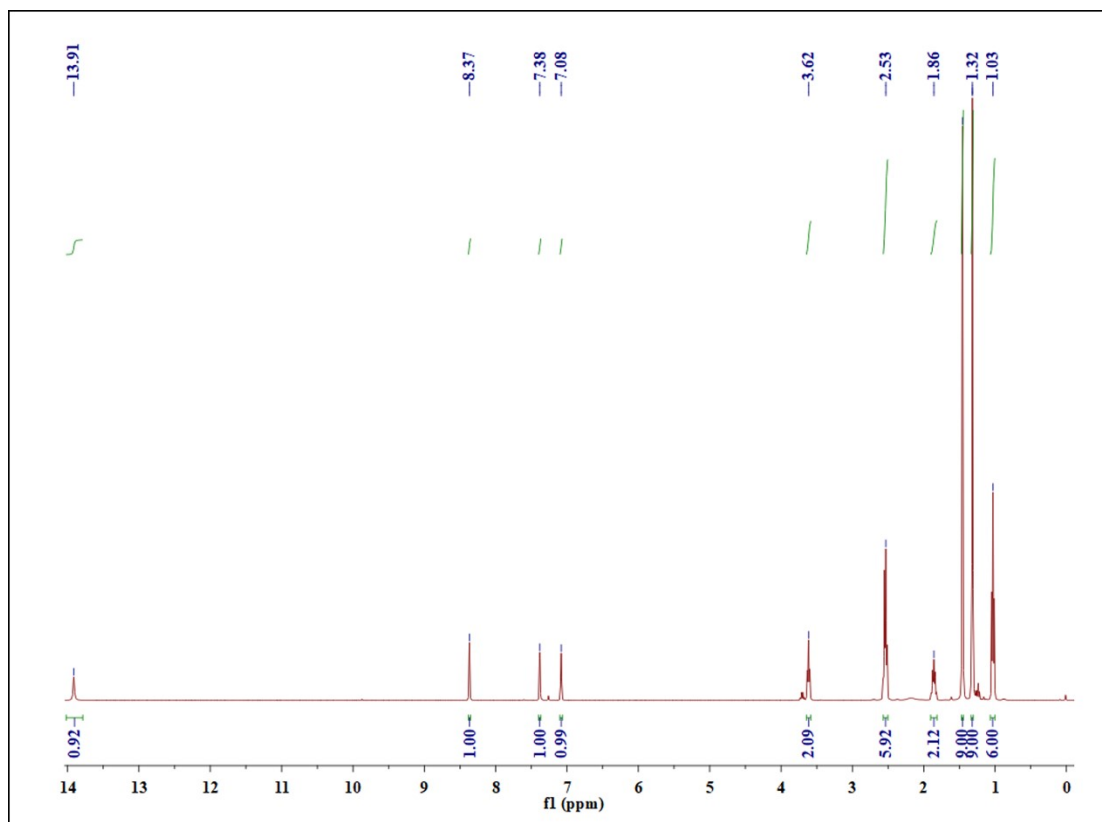

Figure S3.  $^1\text{H}$  NMR of ligand  $\text{L}^3\text{-H}$  in  $\text{CDCl}_3$ .

#### 5. Table S1: Assignments in $^1\text{H}$ NMR data of Salen-type Schiff bases $\text{L}^n\text{-H}$ .

| Ligand    | $\text{CH}=\text{N}$ | $-\text{OH}$   | $\text{CH}_{\text{arom}}$     | $\text{CH}_2$                                 | $\text{CH}_2\text{CH}_3$ | $\text{CH}_2\text{CH}_3$ | $\text{N}(\text{CH}_3)_2$ | $\text{CH}_3$ | $t\text{-Bu}$                 |
|-----------|----------------------|----------------|-------------------------------|-----------------------------------------------|--------------------------|--------------------------|---------------------------|---------------|-------------------------------|
| <b>L1</b> | 8.36 <i>s</i>        | 13.87 <i>s</i> | 7.37 <i>s</i> , 7.08 <i>s</i> | 3.62 <i>t</i> , 2.36 <i>t</i> , 1.87 <i>m</i> |                          |                          | 2.22 <i>s</i>             |               | 1.45 <i>s</i> , 1.31 <i>s</i> |
| <b>L2</b> | 8.31 <i>s</i>        | 13.90 <i>s</i> | 7.39 <i>s</i> , 7.08 <i>s</i> | 3.45 <i>s</i> , 2.22 <i>t</i>                 |                          |                          | 2.32 <i>s</i>             | 0.96 <i>s</i> | 1.45 <i>s</i> , 1.31 <i>s</i> |
| <b>L3</b> | 8.37 <i>s</i>        | 13.91 <i>s</i> | 7.38 <i>s</i> , 7.08 <i>s</i> | 3.62 <i>t</i> , 2.53 <i>m</i> , 1.86 <i>t</i> | 2.53 <i>m</i>            | 1.03 <i>t</i>            |                           | 1.03 <i>t</i> | 1.46 <i>s</i> , 1.32 <i>s</i> |



## 6. Scheme S2:

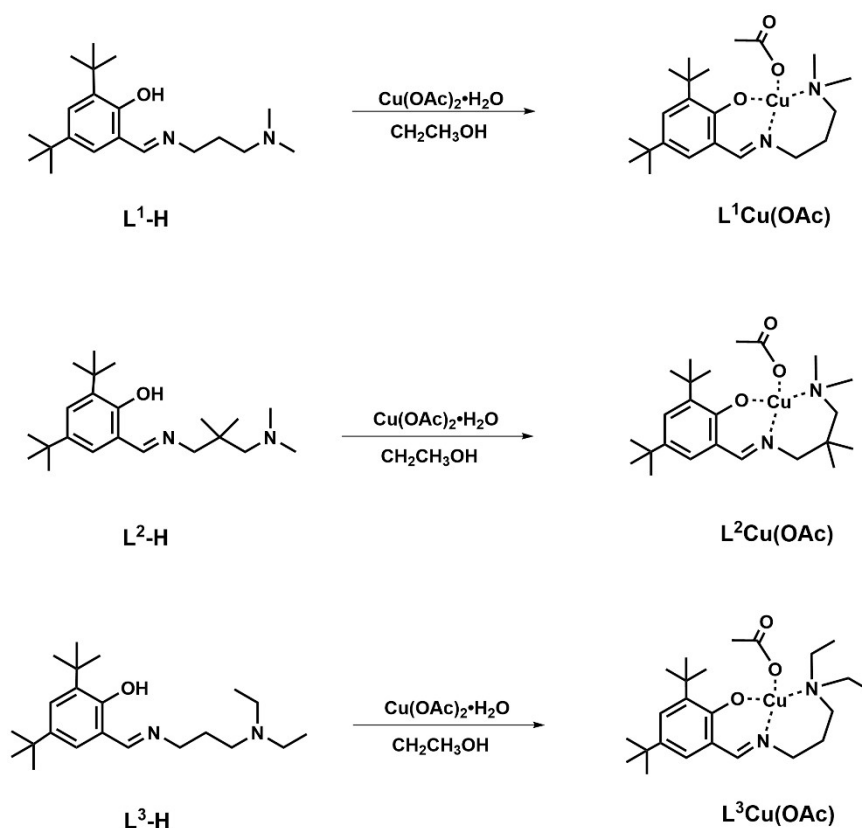

### Scheme S2. Synthesis of Copper-salen complexes L<sup>1</sup>Cu(OAc), L<sup>2</sup>Cu(OAc) and L<sup>3</sup>Cu(OAc).

**Complex L<sup>1</sup>Cu(OAc):** Anal. Calcd for C<sub>22</sub>H<sub>36</sub>CuN<sub>2</sub>O<sub>3</sub>: N, 6.37; C, 60.04; H, 8.25%. Found: N, 6.42; C, 59.93; H, 8.72%. m/z (ESI-MS, methanol): 380.2 ([M – (CH<sub>3</sub>COO)]<sup>+</sup>, 100%, calcd 318.18). Characteristic IR absorptions (cm<sup>-1</sup>): 1628 (ν<sub>C=N</sub>), 1533 (ν<sub>asymmetric acetate</sub>), 1355 (ν<sub>symmetric acetate</sub>).

**Complex L<sup>2</sup>Cu(OAc):** Anal. Calcd for C<sub>24</sub>H<sub>40</sub>CuN<sub>2</sub>O<sub>3</sub>: N, 5.98; C, 61.58; H, 8.61%. Found: N, 6.08; C, 62.56; H, 8.48%. m/z (ESI-MS, methanol): 409.2 ([M – (CH<sub>3</sub>COO)]<sup>+</sup>, 100%, calcd 409.1). Characteristic IR absorptions (cm<sup>-1</sup>): 1630 (ν<sub>C=N</sub>), 1536 (ν<sub>asymmetric acetate</sub>), 1343 (ν<sub>symmetric acetate</sub>).

**Complex L<sup>3</sup>Cu(OAc):** Anal. Calcd for C<sub>24</sub>H<sub>40</sub>CuN<sub>2</sub>O<sub>3</sub>: N, 5.98; C, 61.58; H, 8.61%. Found: N, 5.59; C, 59.25; H, 8.20%. m/z (ESI-MS, methanol): 409.2 ([M – (CH<sub>3</sub>COO)]<sup>+</sup>, 100%, calcd 409.1). Characteristic IR absorptions (cm<sup>-1</sup>): 1628 (ν<sub>C=N</sub>), 1540 (ν<sub>asymmetric acetate</sub>), 1331 (ν<sub>symmetric acetate</sub>).

## 7. Figure S4:

(a)

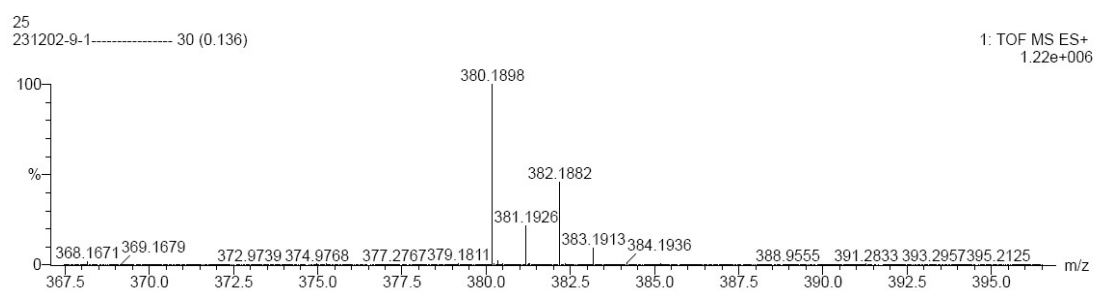

(b)

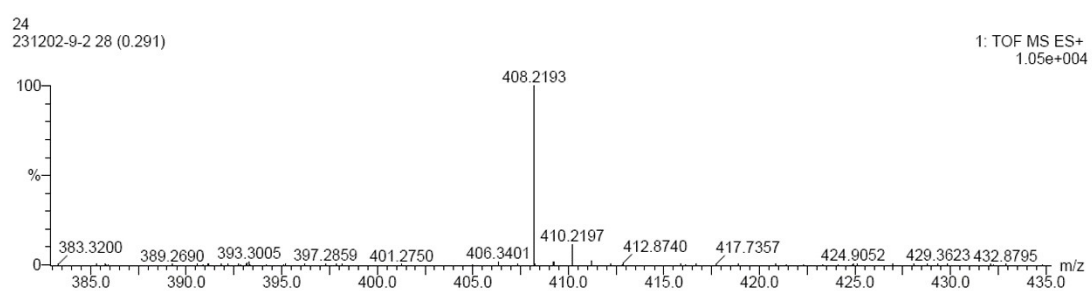

(c)

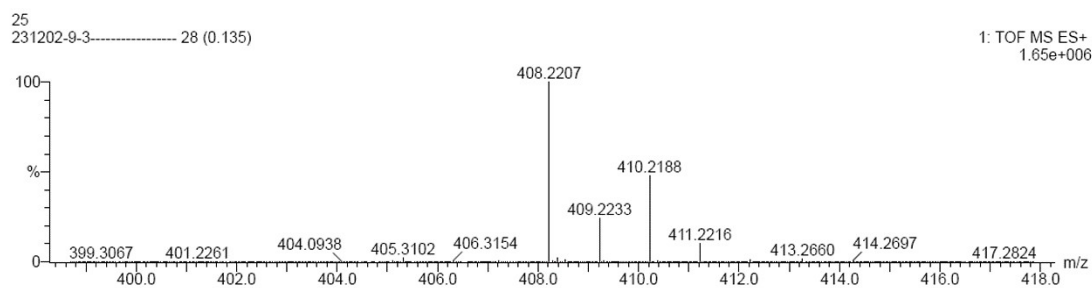

**Figure S4. Mass spectra of L<sup>1</sup>Cu(OAc) (a), L<sup>2</sup>Cu(OAc) (b) and L<sup>3</sup>Cu(OAc) (c).**

**8. Figure S5:**

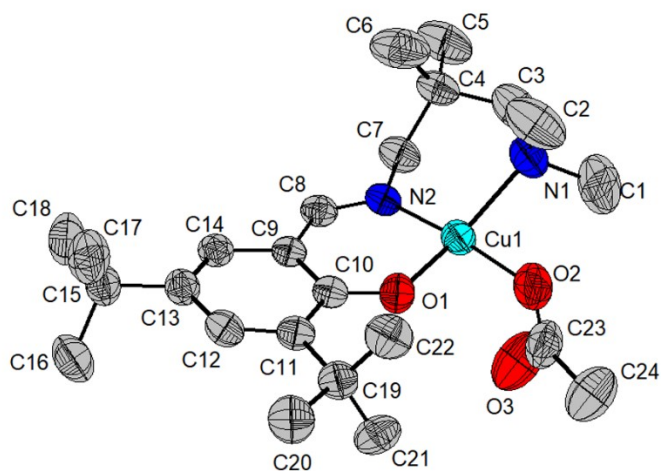

**Figure S5. ORTEP drawing of complex  $L^2Cu(OAc)$  with probability ellipsoids drawn at 50% level.** Hydrogen atoms are omitted for clarity. Selected bond lengths (Å) and angles (deg): Cu(1)-O(1) 1.8938(17), Cu(1)-N(1) 2.092(2), Cu(1)-O(2) 1.944(2), Cu(1)-N(2) 1.9336(19), O(1)-Cu(1)-N(1) 157.25(10), O(1)-Cu(1)-O(2) 85.71(8), N(1)-Cu(1)-O(2) 88.40(10), O(1)-Cu(1)-N(2) 92.71(7), N(1)-Cu(1)-N(2) 95.71(9), O(2)-Cu(1)-N(2) 172.66(10).

We tried our best to obtain the crystal of these complexes to identify the structure of copper-Schiff complexes, but unfortunately, single crystals of  $L^1Cu(OAc)$  and  $L^3Cu(OAc)$  could not be obtained by accessing many methods.

9. Scheme S3:

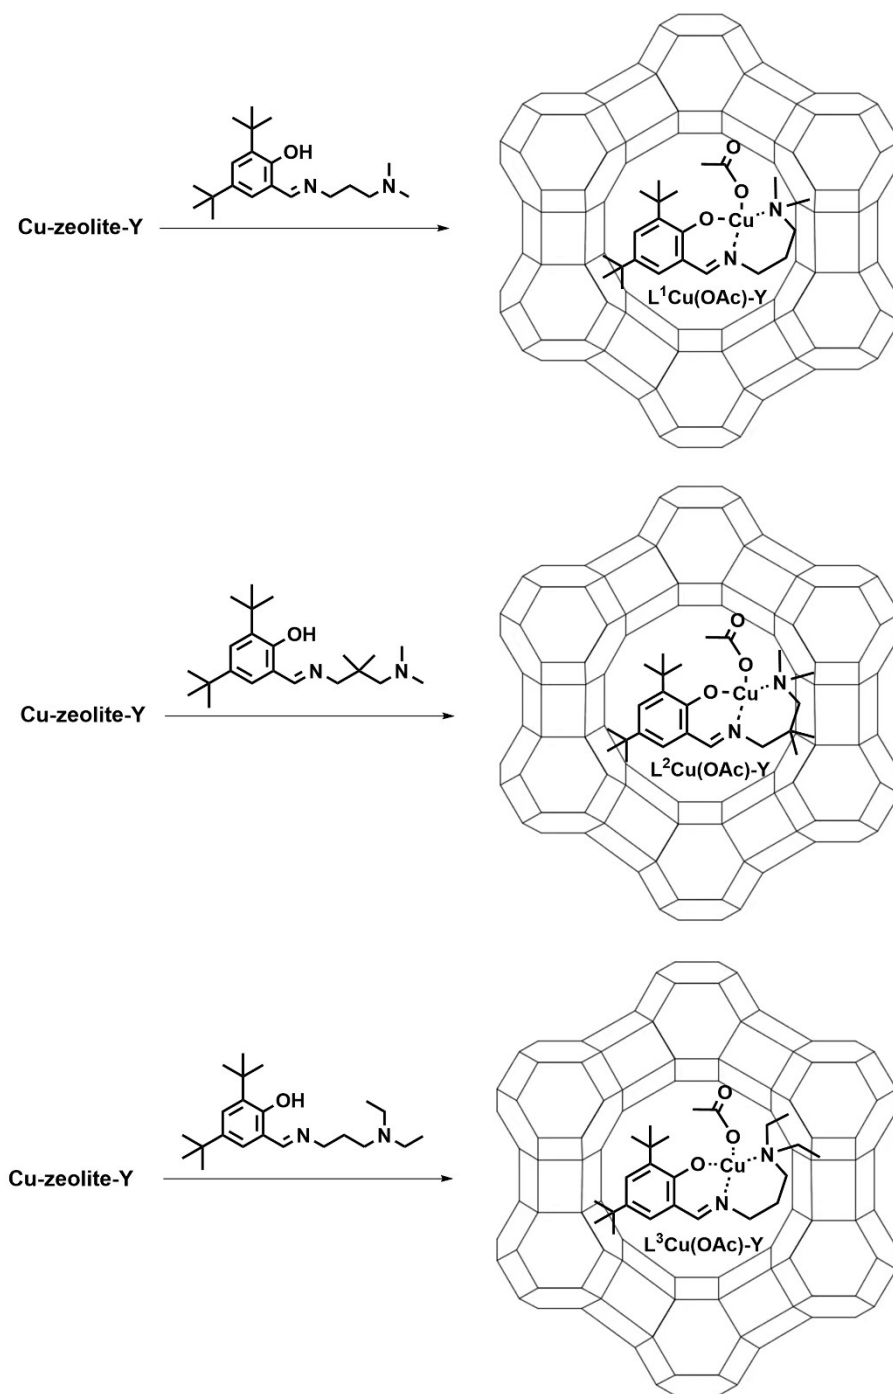

Scheme S3. Synthesis of zeolite encapsulated Copper salen complexes  $L^1Cu(OAc)-Y$ ,  $L^2Cu(OAc)-Y$  and  $L^3Cu(OAc)-Y$ .

10. Figure S6:

(A)

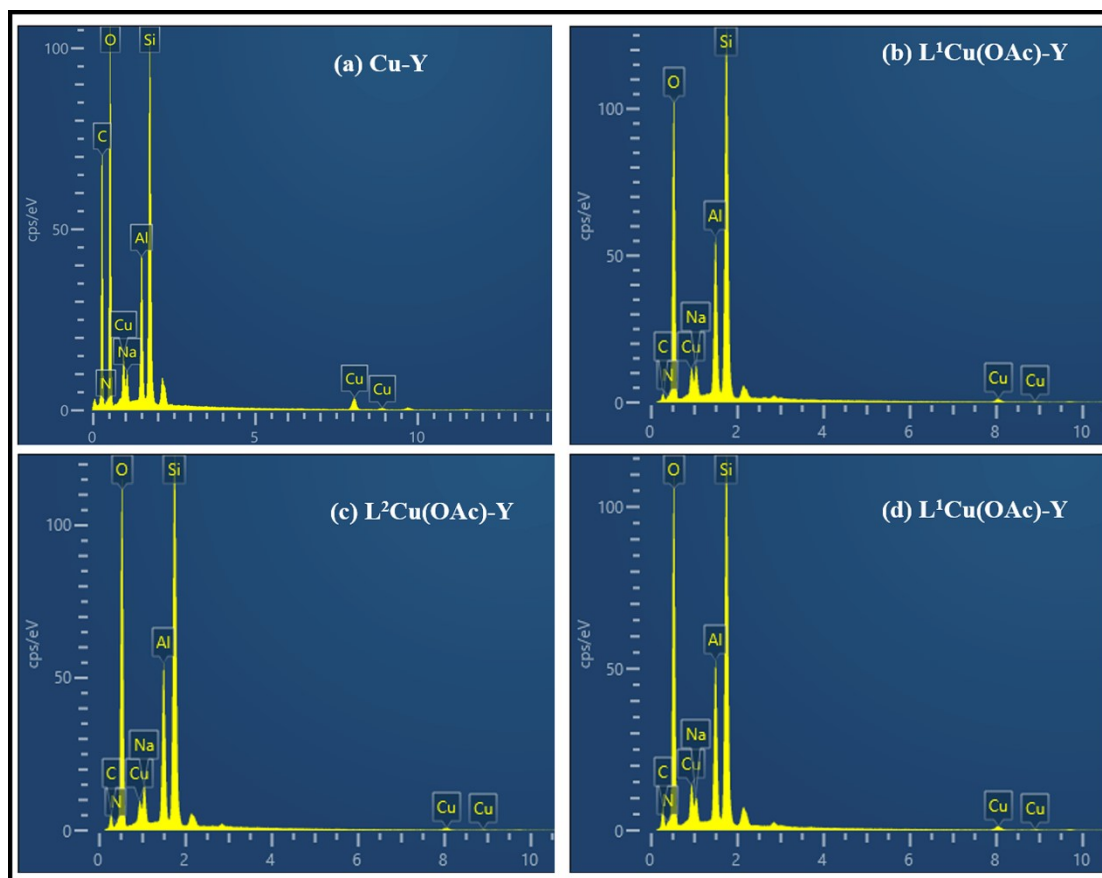

Figure S6 (A). EDX spectra of Cu-Y, L<sup>1</sup>Cu(OAc)-Y, L<sup>2</sup>Cu(OAc)-Y and L<sup>3</sup>Cu(OAc)-Y.

(B)

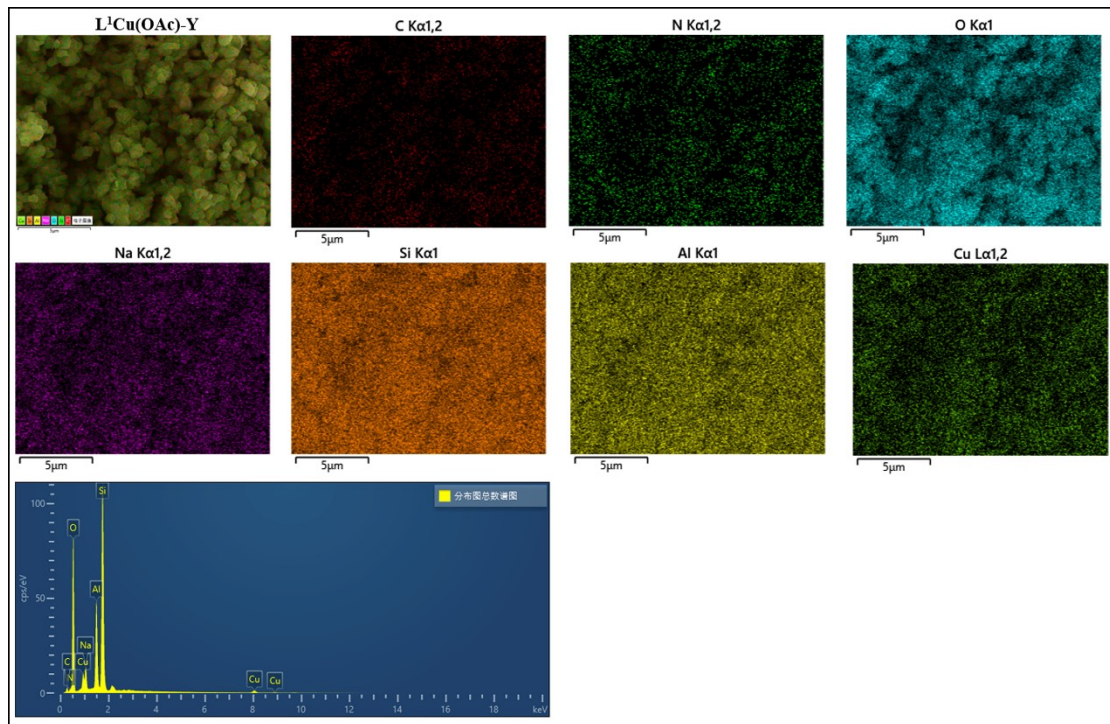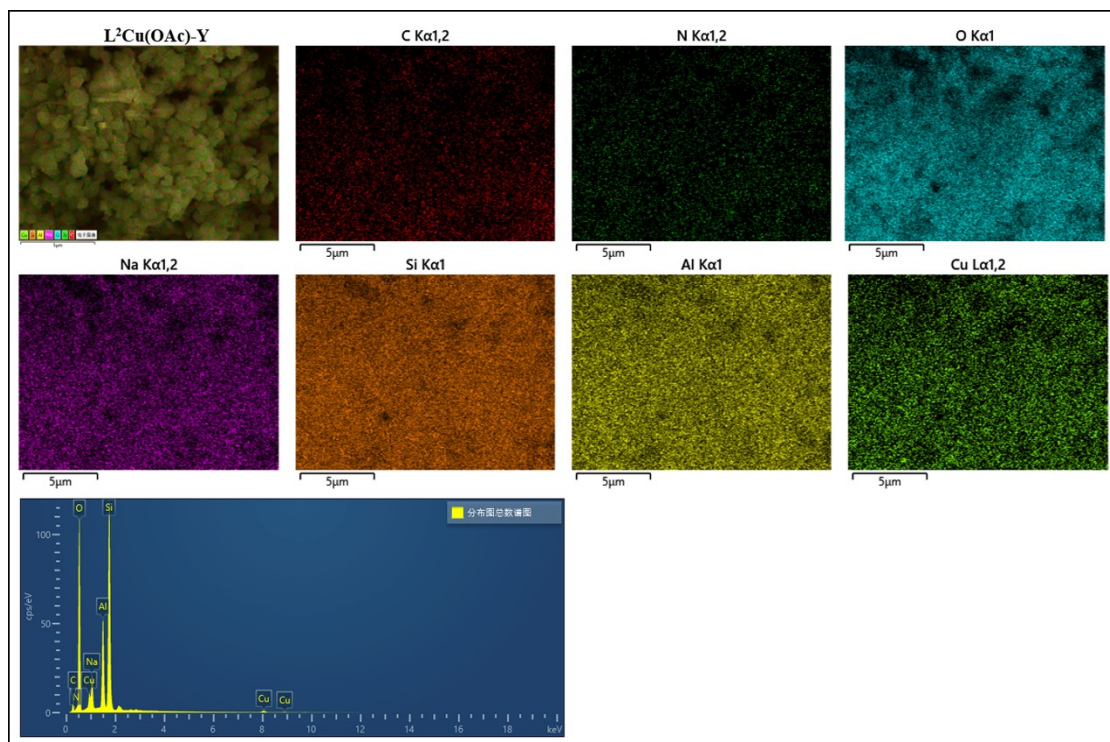



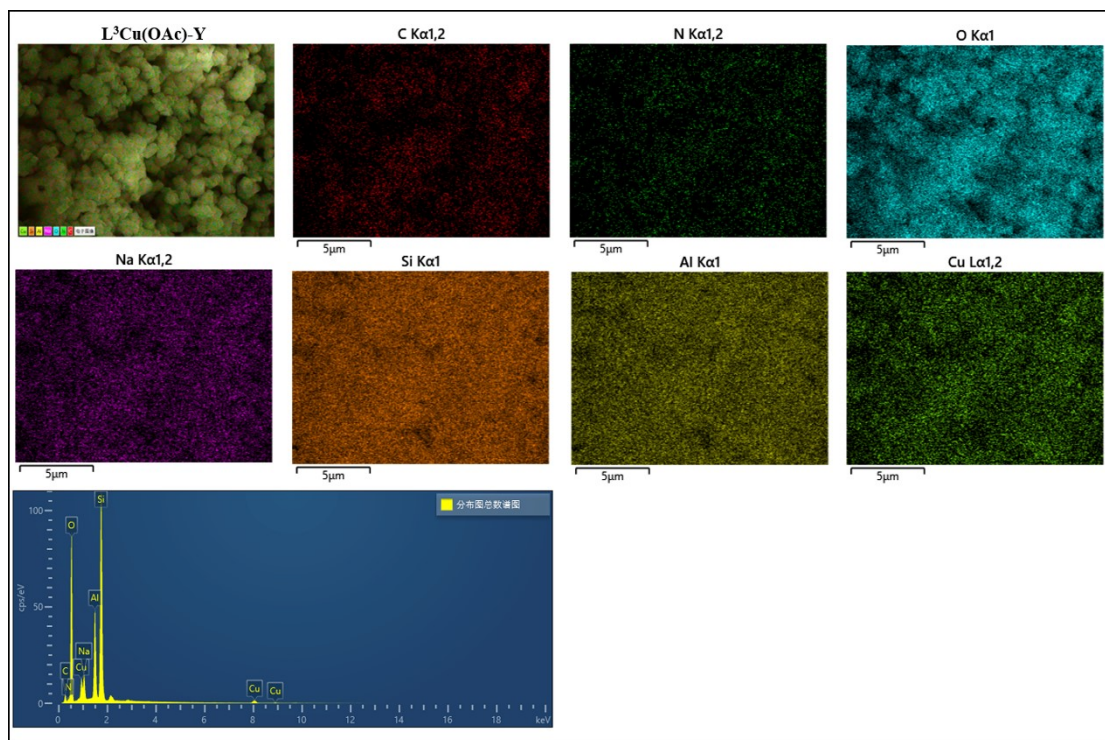

Figure S6 (B). EDX mapping of L<sup>1</sup>Cu(OAc)-Y, L<sup>2</sup>Cu(OAc)-Y and L<sup>3</sup>Cu(OAc)-Y.

11. Figure S7:

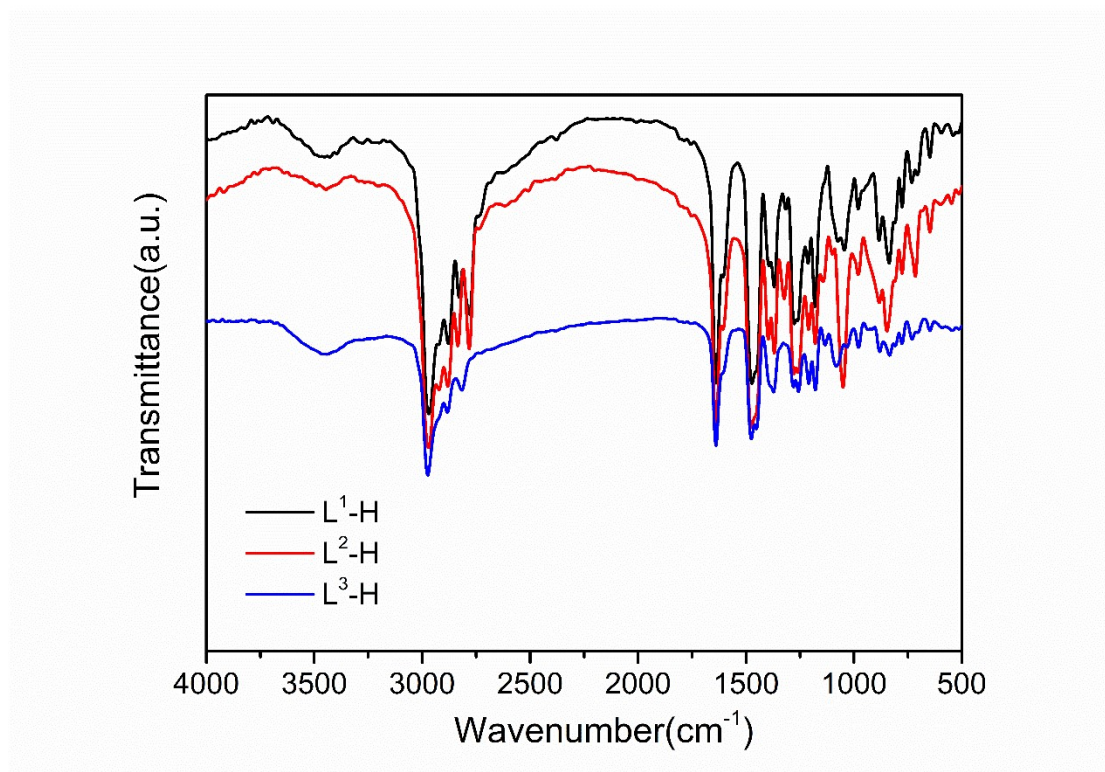

Figure S7. FTIR spectra of (a) L<sup>1</sup>-H, (b) L<sup>2</sup>-H and (c) L<sup>3</sup>-H.

12. Figure S8:

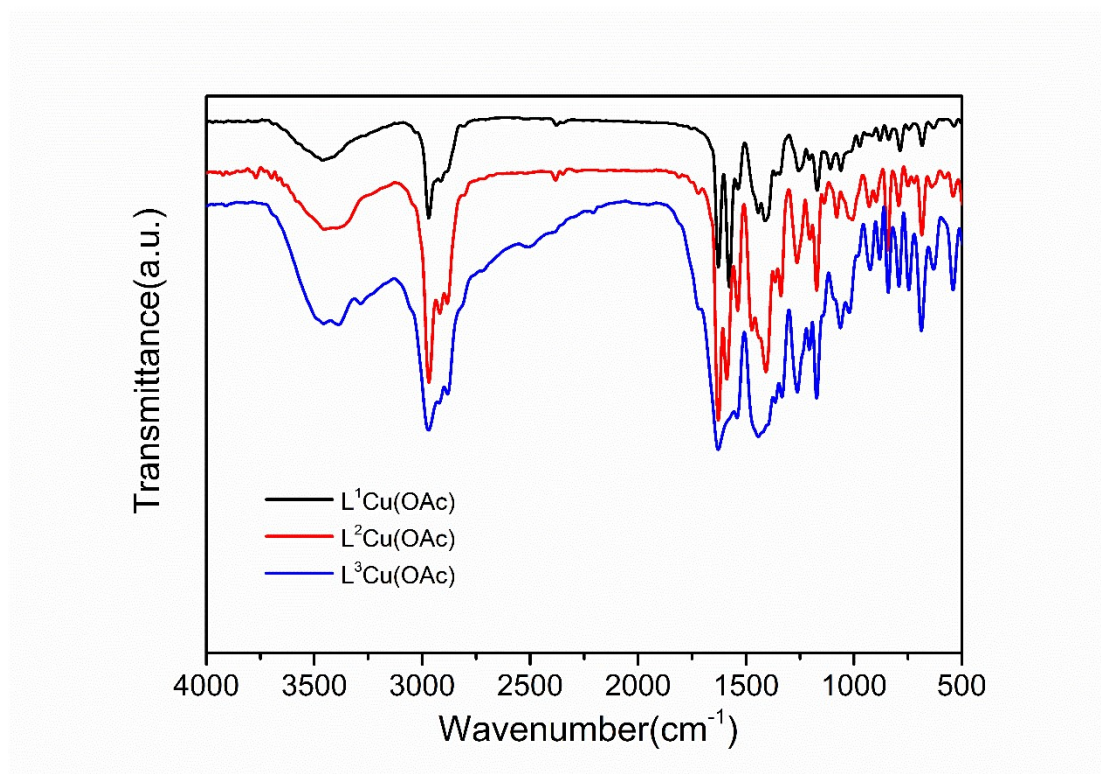

Figure S8. FTIR spectra of (a) L¹Cu(OAc), (b) L²Cu(OAc) and (c) L³Cu(OAc)

13. Table S2: FTIR spectral data (in cm⁻¹) for Ligands.

| Samples | C=N stretching | C=C stretching | $\nu_{C-H}$ deformation | C-O stretching |
|---------|----------------|----------------|-------------------------|----------------|
| L¹-H    | 1640           | 1604, 1472     | 1369                    | 1263           |
| L²-H    | 1641           | 1607, 1474     | 1368                    | 1276           |
| L³-H    | 1639           | 1605, 1476     | 1370                    | 1246           |



14. Figure S9:

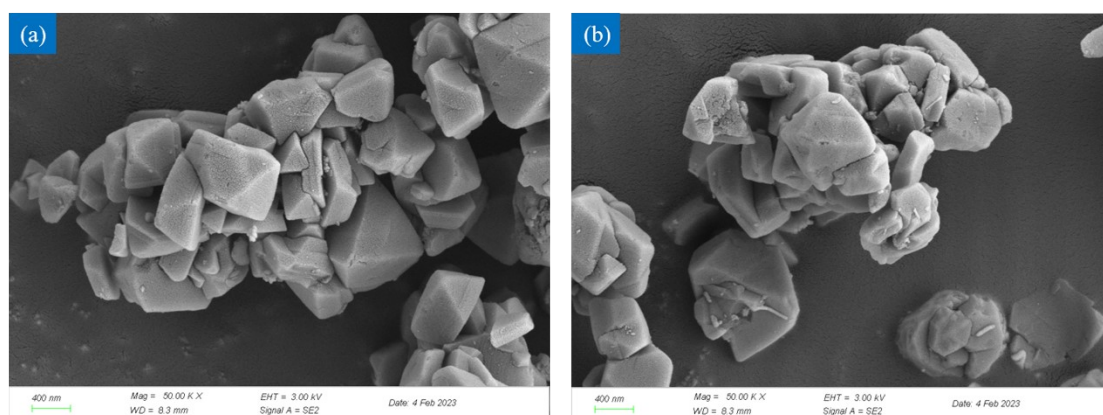

Figure S9. SEM images after Soxhlet extraction (a) L<sup>1</sup>Cu(OAc)-Y and (b) L<sup>2</sup>Cu(OAc)-Y.

15. Figure S10:

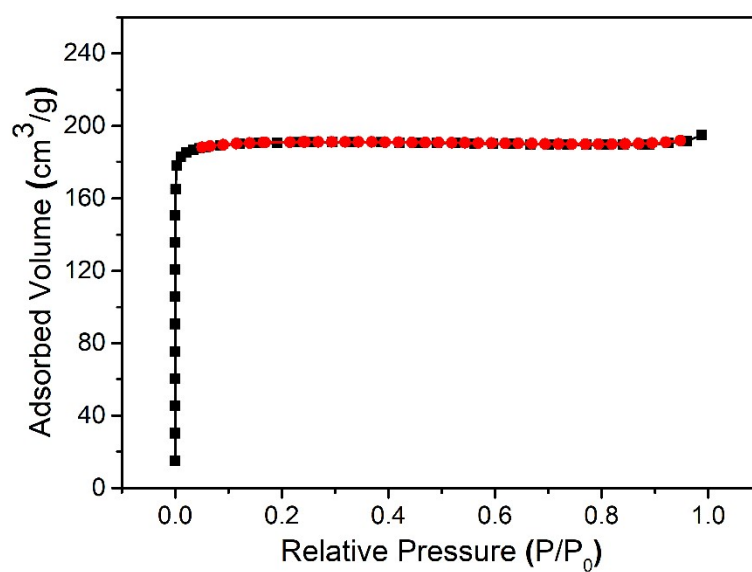

Figure S10. BET isotherms of NaY.

### 16. Figure S11:

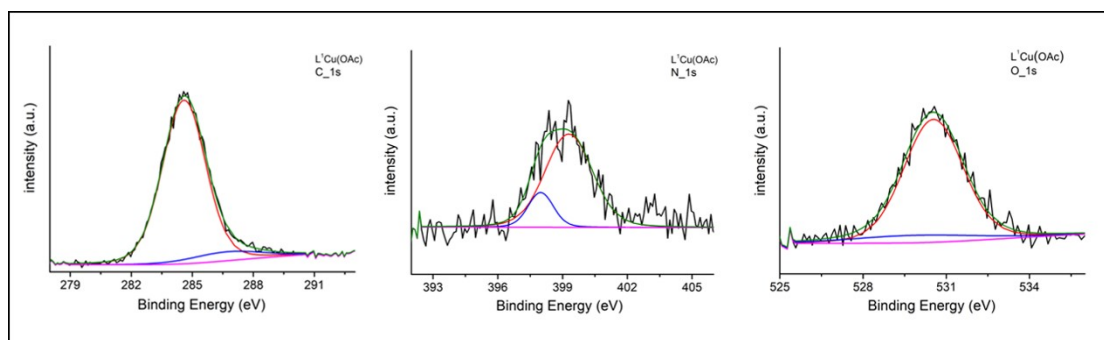

Figure S11. High resolution XPS spectra of C (1s), N (1s) and O (1s) for L<sup>1</sup>Cu(OAc).

### 17. Figure S12:

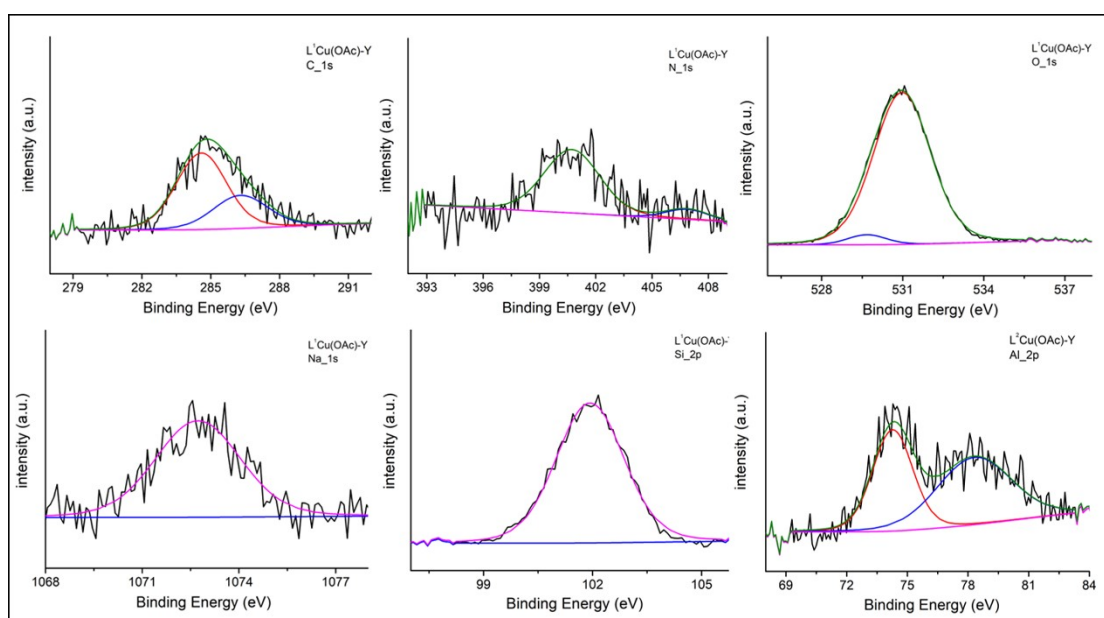

Figure S12. High resolution XPS spectra of C (1s), N (1s), O (1s), Al (2p), Si (2p) and Na (1s) for L<sup>1</sup>Cu(OAc)-Y.

### 18. Figure S13:

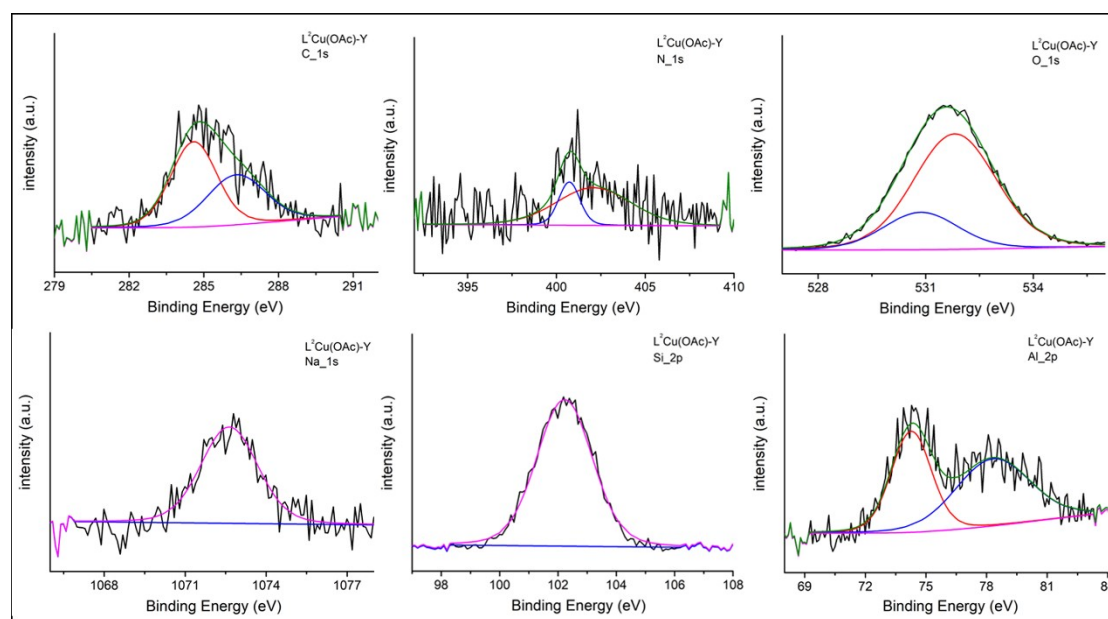

**Figure S13. High resolution XPS spectra of C (1s), N (1s), O (1s), Al (2p), Si (2p) and Na (1s) for  $L^2Cu(OAc)-Y$ .**

### 19. Figure S14:

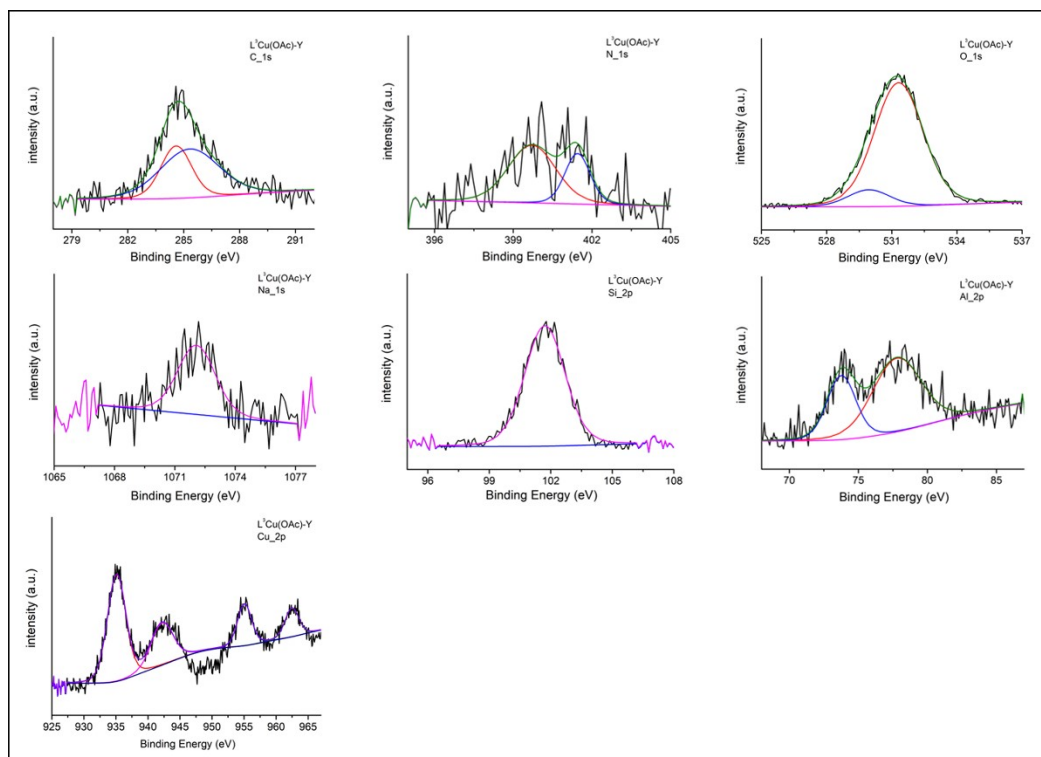

**Figure S14. High resolution XPS spectra of C (1s), N (1s), O (1s), Al (2p), Si (2p), Na (1s) and Cu(2p) for  $L^3Cu(OAc)-Y$ .**

20. Figure S15:

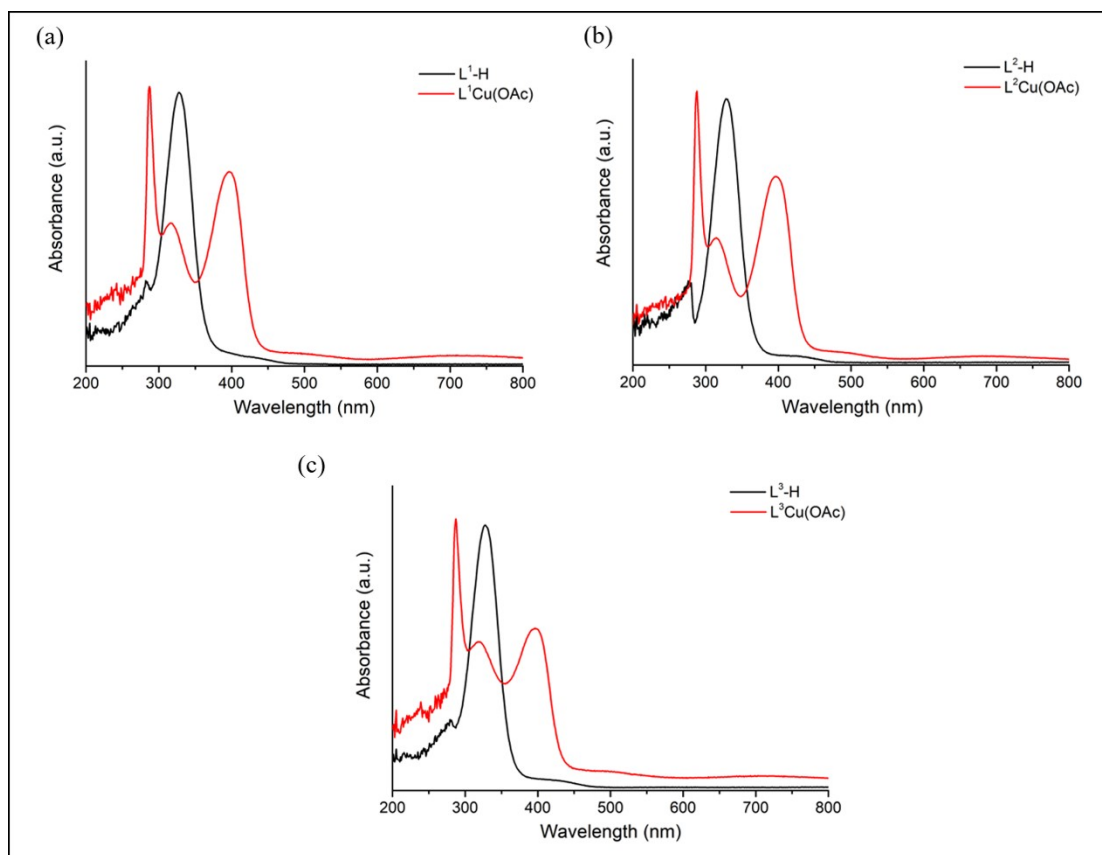

Figure S15. Solution UV-vis spectra (A) L<sup>1</sup>-H and L<sup>1</sup>Cu(OAc), (B) L<sup>2</sup>-H and L<sup>2</sup>Cu(OAc), (C) L<sup>3</sup>-H and L<sup>3</sup>Cu(OAc).

21. Figure. S16:

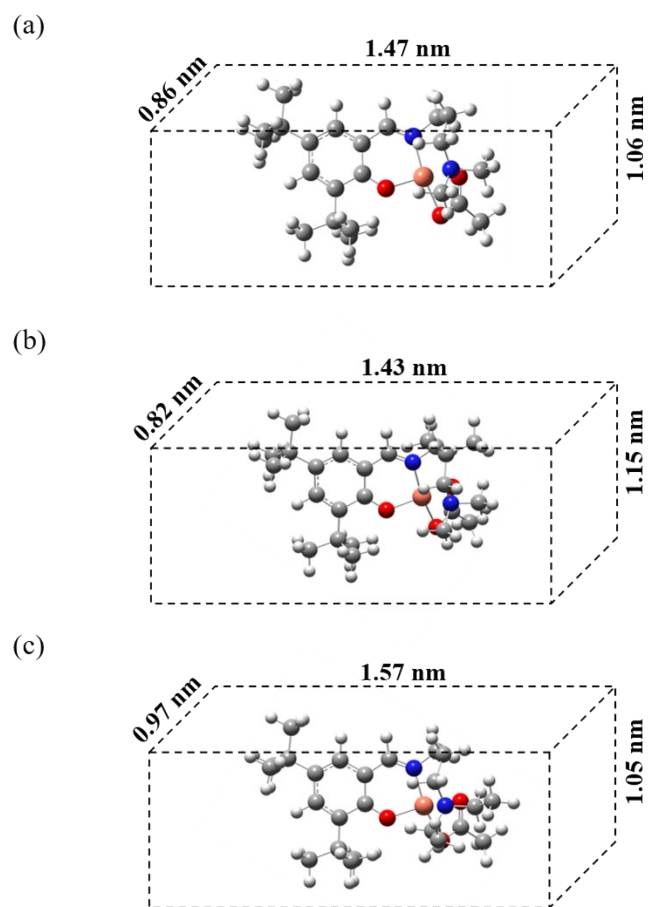

Figure. S16 Molecular dimension of free salen-complexes  $L^1Cu(OAc)$ -  $L^3Cu(OAc)$  after optimization.

22. Figure S17:

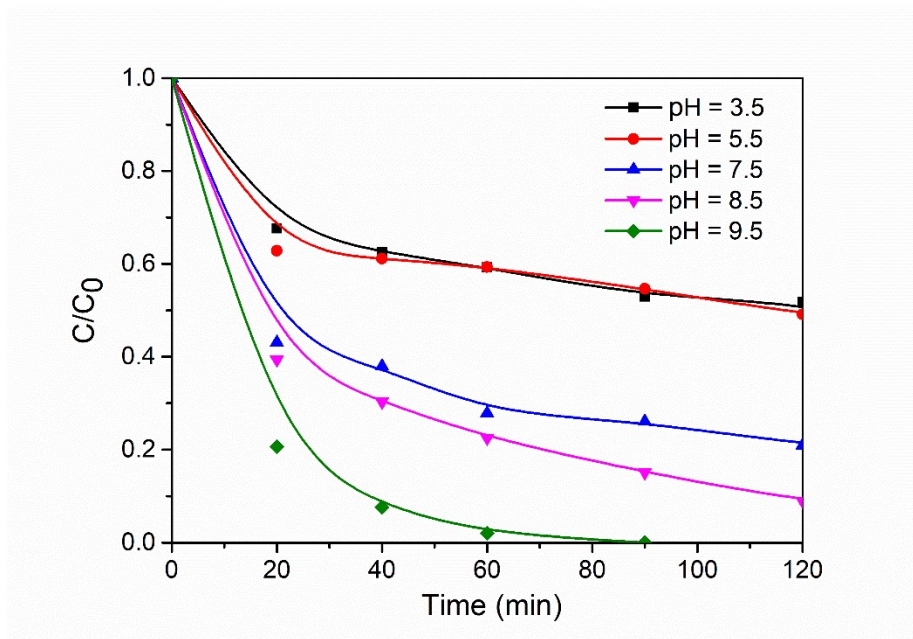

Figure S17. Effects of pH on MB degradation. Catalytic degradation performances of  $L^3Cu(OAc)-Y$  with different value of pH. Reaction condition:  $[MB] = 25 \text{ mg}\cdot\text{L}^{-1}$ , catalyst =  $0.5 \text{ g}\cdot\text{L}^{-1}$ ,  $[H_2O_2] = 0.86 \text{ mol}\cdot\text{L}^{-1}$ ,  $T = 30^\circ\text{C}$ .

23. Figure S18:

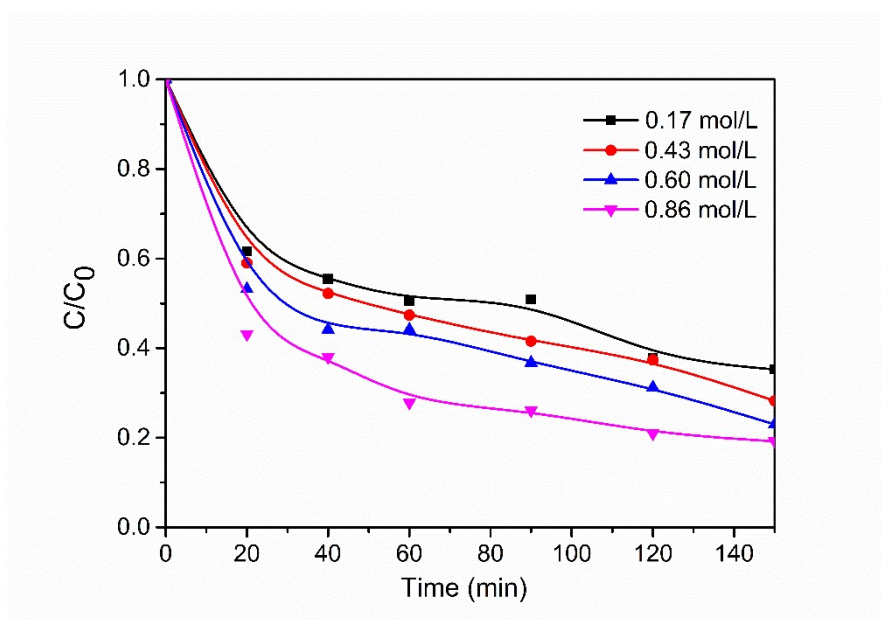

Figure S18. Effects of  $H_2O_2$  concentration on MB degradation. Catalytic degradation performances of  $L^3Cu(OAc)-Y$  with different concentration of  $H_2O_2$ . Reaction condition:  $[MB] = 25 \text{ mg}\cdot\text{L}^{-1}$ , catalyst =  $0.5 \text{ g}\cdot\text{L}^{-1}$ ,  $T = 30^\circ\text{C}$ , initial solution pH = 7.5.



24. Figure S19:

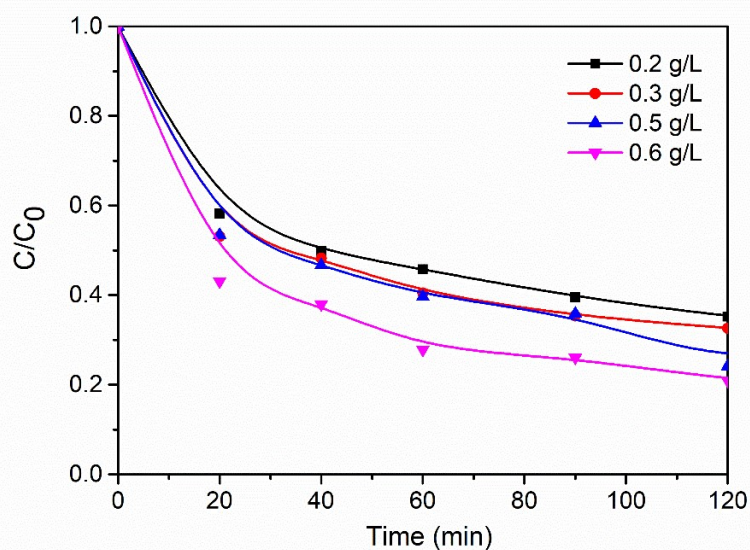

Figure S19. Effects of amount of catalyst on MB degradation. Catalytic degradation performances of  $L^3Cu(OAc)-Y$  with different amount of catalyst. Reaction condition:  $[MB] = 25 \text{ mg}\cdot\text{L}^{-1}$ ,  $[H_2O_2] = 0.86 \text{ mol}\cdot\text{L}^{-1}$ ,  $T = 30^\circ\text{C}$ , initial solution  $\text{pH} = 7.5$ .

25. Figure S20:

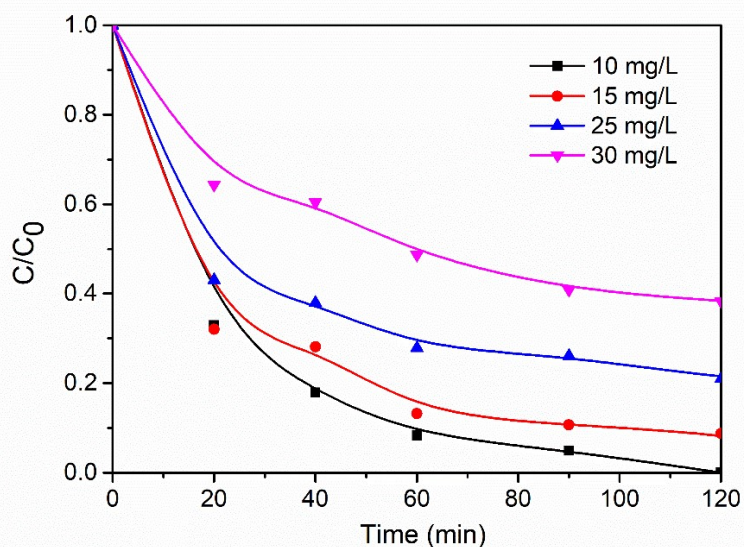

Figure S20. Effects of initial MB concentration on MB degradation. Catalytic degradation performances of  $L^3Cu(OAc)-Y$  with different MB concentration. Reaction condition:  $[MB] = 25 \text{ mg}\cdot\text{L}^{-1}$ , catalyst =  $0.5 \text{ g}\cdot\text{L}^{-1}$ ,  $[H_2O_2] = 0.86 \text{ mol}\cdot\text{L}^{-1}$ ,  $T = 30^\circ\text{C}$ , initial solution  $\text{pH} = 7.5$ .

**26. Table S3: Comparison of the catalytic performance of L<sup>3</sup>Cu(OAc)-Y with some other catalysts.**

| Catalysts                               | Catalyst<br>(g·L <sup>-1</sup> ) | Objects<br>(mg·L <sup>-1</sup> ) | pH  | Temp<br>(°C) | Time<br>(min) | Degradation<br>efficiency | Ref.                 |
|-----------------------------------------|----------------------------------|----------------------------------|-----|--------------|---------------|---------------------------|----------------------|
| Cu-NaY                                  | 0.4                              | 2.5 AD <sup>a</sup>              | 6   | 30           | 180           | 85%                       | [1]                  |
| PS-Fe(III)BBZNH                         | 0.5                              | 75 XO <sup>b</sup>               | 8   | -            | 80            | 63.4%                     | [2]                  |
| Fe@S-1                                  | 0.5                              | 10 MB                            | 2   | 60           | 30            | 90%                       | [3]                  |
| Molecule imprinted<br>Fe-zeolites       | 0.3                              | 9.1 MB                           | 4   | 30           | 180           | 92.2%                     | [4]                  |
| Fe <sub>3</sub> O <sub>4</sub> /zeolite | 0.6                              | 50 MB                            | 3   | -            | 60            | 99%                       | [5]                  |
| Mn-salen-Y zeolite                      | 0.5                              | 2.75 AD <sup>a</sup>             | 2   | 30           | 120           | 60%                       | [6]                  |
| Cu-salen-Y zeolite                      | 3                                | 3 AB 113 <sup>c</sup>            | 5.4 | 30           | 180           | 80.5%                     | [7]                  |
| L <sup>3</sup> Cu(OAc)-Y                | 0.5                              | 25 MB                            | 7.5 | 30           | 120           | 80.7%                     | <b>This<br/>work</b> |

<sup>a</sup> AD = acid dye; <sup>b</sup> XO= xylenol orange; <sup>c</sup> AB 113 = acid blue 113;

## Reference

- [1] N. N. Fathima, R. Aravindhan, J. R. Rao, B. U. Nair, *Chemosphere*, 2008, **70**, 1146–1151.
- [2] S. E. Rao, V. Gayathri, *J. Appl. Polym. Sci*, 2018, **135**, 46480.
- [3] H. Guo, L. Chen, X. Zhang, H. Chen, Y. Shao, *Chinese J Chem Eng*, 2023, **53**, 251–259.
- [4] Y. Zhang, J. Shang, Y. Song, C. Rong, Y. Wang, W. Huang, K. Yu, *Water Sci Technol*, 2017, **75**, 659–669.
- [5] H. G. Quynh, H. V. Thanh, N. T. T. Phuong, N. P. T. Duy, L. H. Hung, N. V. Dung, N. T. H. Duong, N. Q. Long. *Environ Technol Inno*, 2023, **31**, 103155.
- [6] R. Aravindhan, N. N. Fathima, J. R. Rao, B. U. Nair, *J. Hazard. Mater*, 2006, **138**, 152–159.
- [7] S. L. Hailu, B. U. Nair, M. R. Abshiro, R. Aravindhan, I. Diaz, M. Tessema, *J Porous Mater*, 2015, **22**, 1363–1373.



27. Figure S21:

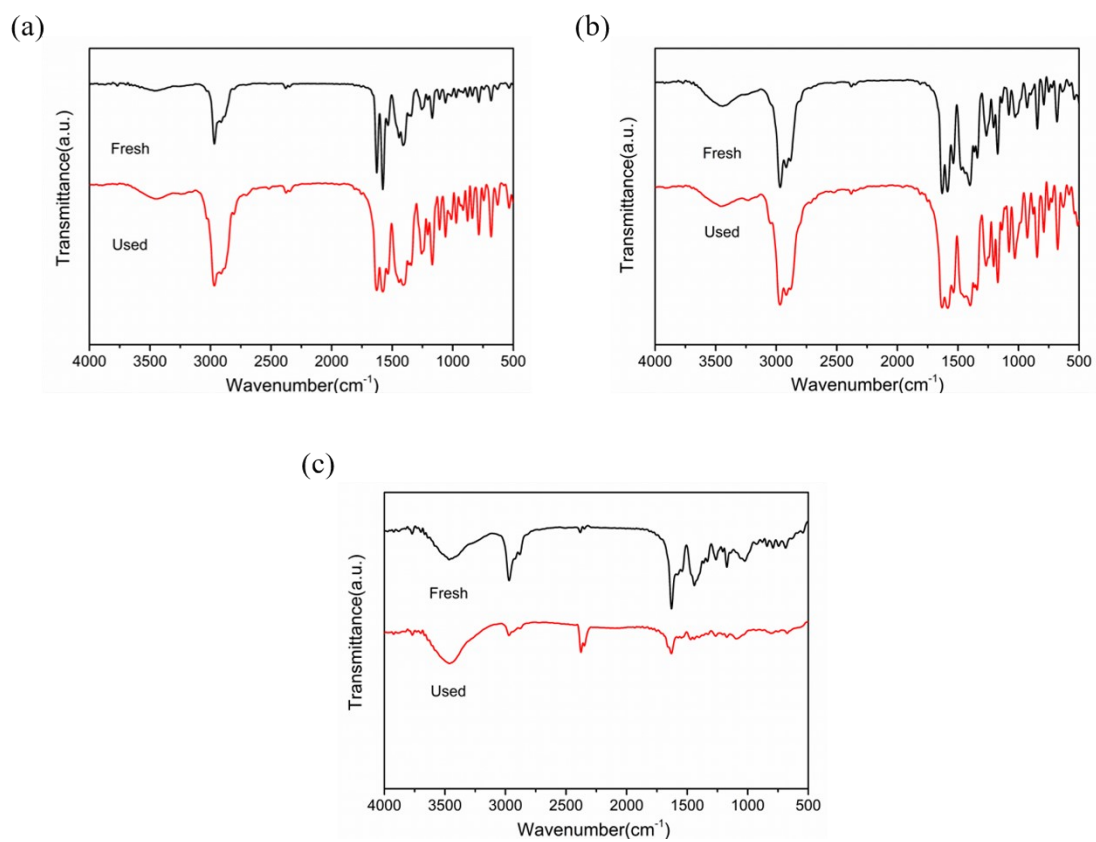

Figure S21. FT-IR spectra of fresh and used complexes of  $L^1Cu(OAc)$  (a),  $L^2Cu(OAc)$  (b) and  $L^3Cu(OAc)$  (c) in free states.

28. Figure S22:

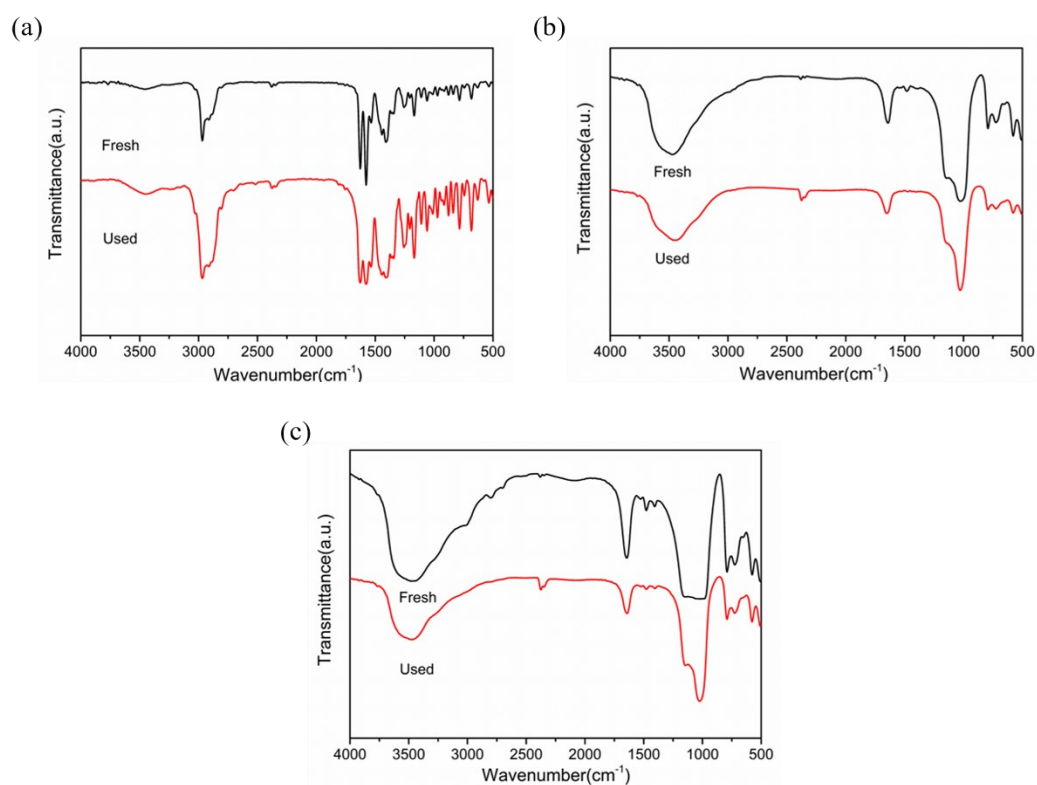

Figure S22. FT-IR spectra of fresh and used complexes of L<sup>1</sup>Cu(OAc)-Y (a), L<sup>2</sup>Cu(OAc)-Y (b) and L<sup>3</sup>Cu(OAc)-Y (c) in encapsulated states.

29. Figure S23:

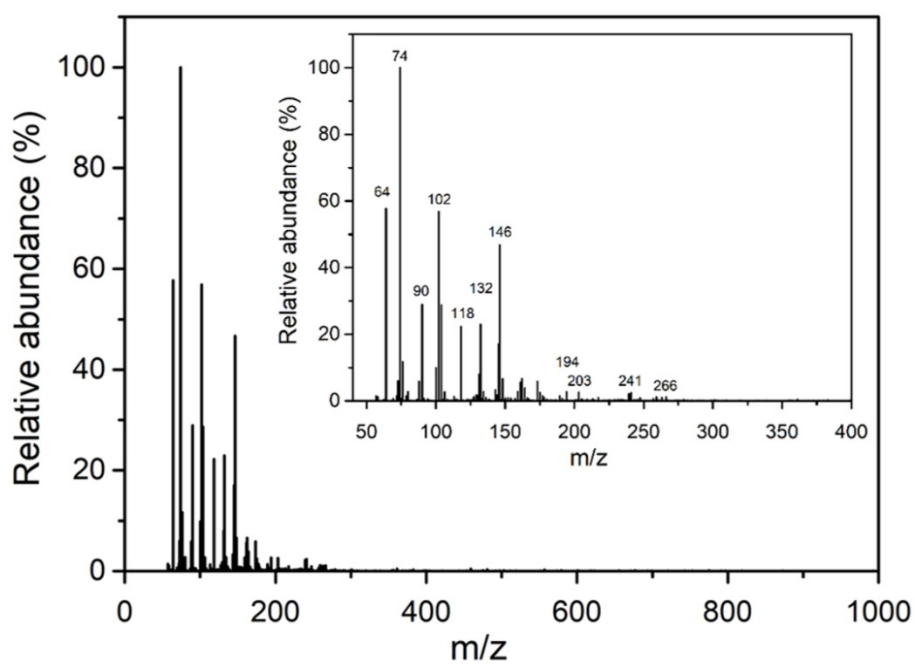

Figure S23. ESI-MS spectra of MB degradation after 120 min.

## Coordinates of the studied molecules

### L<sup>1</sup>Cu(OAc)

| Center<br>Number | Atomic<br>Number | Atomic<br>Type | Coordinates (Angstroms) |           |           |
|------------------|------------------|----------------|-------------------------|-----------|-----------|
|                  |                  |                | X                       | Y         | Z         |
| 1                | 29               | 0              | -1.906477               | 0.050533  | -0.439096 |
| 2                | 6                | 0              | -2.472502               | -1.911181 | 1.910451  |
| 3                | 1                | 0              | -2.913330               | -2.219787 | 2.875506  |
| 4                | 1                | 0              | -1.421768               | -1.668009 | 2.100943  |
| 5                | 6                | 0              | -2.535401               | -3.103039 | 0.948011  |
| 6                | 6                | 0              | -2.092869               | -2.803182 | -0.501347 |
| 7                | 1                | 0              | -1.688428               | -3.714520 | -0.962095 |
| 8                | 1                | 0              | -2.947703               | -2.478350 | -1.100678 |
| 9                | 6                | 0              | 0.151032                | -1.975175 | -0.490069 |
| 10               | 1                | 0              | 0.464849                | -3.023961 | -0.571365 |
| 11               | 6                | 0              | 1.202104                | -1.017086 | -0.318412 |
| 12               | 6                | 0              | 0.940054                | 0.347350  | 0.009361  |
| 13               | 6                | 0              | 2.071398                | 1.212741  | 0.219068  |
| 14               | 6                | 0              | 3.334122                | 0.674573  | 0.088221  |
| 15               | 1                | 0              | 4.183747                | 1.330557  | 0.242218  |
| 16               | 6                | 0              | 3.613302                | -0.677097 | -0.232130 |
| 17               | 6                | 0              | 2.529963                | -1.496855 | -0.423439 |
| 18               | 6                | 0              | -4.536834               | -0.852673 | 1.191351  |
| 19               | 1                | 0              | -4.703581               | -1.564502 | 0.380317  |
| 20               | 1                | 0              | -4.963310               | 0.105559  | 0.884232  |
| 21               | 1                | 0              | -5.063890               | -1.199266 | 2.096962  |
| 22               | 6                | 0              | -2.878828               | 0.406265  | 2.388285  |
| 23               | 1                | 0              | -3.296530               | 1.331320  | 1.982880  |
| 24               | 1                | 0              | -1.802904               | 0.551992  | 2.521552  |

|    |   |   |           |           |           |
|----|---|---|-----------|-----------|-----------|
| 25 | 1 | 0 | -3.339444 | 0.194379  | 3.368111  |
| 26 | 7 | 0 | -3.107320 | -0.679436 | 1.431760  |
| 27 | 7 | 0 | -1.114864 | -1.728970 | -0.536987 |
| 28 | 8 | 0 | -0.256982 | 0.824953  | 0.143385  |
| 29 | 1 | 0 | 2.665073  | -2.547499 | -0.666299 |
| 30 | 6 | 0 | 1.851178  | 2.692419  | 0.568876  |
| 31 | 6 | 0 | 1.069403  | 3.389299  | -0.563789 |
| 32 | 6 | 0 | 1.069184  | 2.810305  | 1.893106  |
| 33 | 6 | 0 | 3.178954  | 3.445217  | 0.747719  |
| 34 | 1 | 0 | 1.625118  | 3.327126  | -1.506997 |
| 35 | 1 | 0 | 0.087081  | 2.935236  | -0.704287 |
| 36 | 1 | 0 | 0.930489  | 4.450356  | -0.322255 |
| 37 | 1 | 0 | 1.617423  | 2.323700  | 2.708823  |
| 38 | 1 | 0 | 0.937141  | 3.867035  | 2.156133  |
| 39 | 1 | 0 | 0.084001  | 2.349454  | 1.805885  |
| 40 | 1 | 0 | 2.967450  | 4.491416  | 0.994367  |
| 41 | 1 | 0 | 3.781726  | 3.030317  | 1.564387  |
| 42 | 1 | 0 | 3.781860  | 3.439537  | -0.167991 |
| 43 | 6 | 0 | 5.068239  | -1.142069 | -0.343177 |
| 44 | 6 | 0 | 5.787810  | -0.912453 | 0.999880  |
| 45 | 6 | 0 | 5.170077  | -2.633336 | -0.691032 |
| 46 | 6 | 0 | 5.781961  | -0.341423 | -1.449480 |
| 47 | 1 | 0 | 5.787809  | 0.144737  | 1.285636  |
| 48 | 1 | 0 | 5.299441  | -1.476337 | 1.802342  |
| 49 | 1 | 0 | 6.832655  | -1.239748 | 0.935899  |
| 50 | 1 | 0 | 4.698451  | -2.856744 | -1.654839 |
| 51 | 1 | 0 | 6.223485  | -2.926137 | -0.761788 |
| 52 | 1 | 0 | 4.702868  | -3.260473 | 0.077028  |
| 53 | 1 | 0 | 6.826867  | -0.661899 | -1.541316 |
| 54 | 1 | 0 | 5.289389  | -0.493010 | -2.416219 |

|    |   |   |           |           |           |
|----|---|---|-----------|-----------|-----------|
| 55 | 1 | 0 | 5.781132  | 0.733139  | -1.238266 |
| 56 | 6 | 0 | -3.766581 | 1.095289  | -1.509206 |
| 57 | 8 | 0 | -3.548679 | -0.127788 | -1.747097 |
| 58 | 8 | 0 | -3.001741 | 1.718874  | -0.708989 |
| 59 | 6 | 0 | -4.901830 | 1.820628  | -2.179892 |
| 60 | 1 | 0 | -5.310814 | 2.582825  | -1.513171 |
| 61 | 1 | 0 | -4.516844 | 2.325310  | -3.072419 |
| 62 | 1 | 0 | -5.677625 | 1.116945  | -2.486774 |
| 63 | 1 | 0 | -1.880875 | -3.872113 | 1.375725  |
| 64 | 1 | 0 | -3.542288 | -3.534626 | 0.925650  |

-----

**L<sup>2</sup>Cu(OAc)**

-----

| Center<br>Number | Atomic<br>Number | Atomic<br>Type | Coordinates (Angstroms) |           |           |
|------------------|------------------|----------------|-------------------------|-----------|-----------|
|                  |                  |                | X                       | Y         | Z         |
| 1                | 29               | 0              | -1.678727               | 0.535270  | -0.425574 |
| 2                | 6                | 0              | -2.739466               | -1.572373 | 1.593124  |
| 3                | 1                | 0              | -3.374509               | -1.904384 | 2.435061  |
| 4                | 1                | 0              | -1.725337               | -1.456805 | 1.989361  |
| 5                | 6                | 0              | -2.697563               | -2.718967 | 0.548647  |
| 6                | 6                | 0              | -2.166295               | -2.247235 | -0.828291 |
| 7                | 1                | 0              | -1.845721               | -3.127350 | -1.404963 |
| 8                | 1                | 0              | -2.964872               | -1.755994 | -1.393655 |
| 9                | 6                | 0              | 0.153895                | -1.665412 | -0.721954 |
| 10               | 1                | 0              | 0.358577                | -2.713679 | -0.973280 |
| 11               | 6                | 0              | 1.298547                | -0.854626 | -0.437098 |
| 12               | 6                | 0              | 1.181730                | 0.479800  | 0.057942  |
| 13               | 6                | 0              | 2.398663                | 1.183958  | 0.370980  |

|    |   |   |           |           |           |
|----|---|---|-----------|-----------|-----------|
| 14 | 6 | 0 | 3.596782  | 0.533373  | 0.167869  |
| 15 | 1 | 0 | 4.510386  | 1.069610  | 0.400056  |
| 16 | 6 | 0 | 3.731800  | -0.789289 | -0.323527 |
| 17 | 6 | 0 | 2.568572  | -1.456654 | -0.611447 |
| 18 | 6 | 0 | -4.541020 | -0.136777 | 0.743865  |
| 19 | 1 | 0 | -4.682884 | -0.635737 | -0.214797 |
| 20 | 1 | 0 | -4.798037 | 0.915987  | 0.603916  |
| 21 | 1 | 0 | -5.221554 | -0.571339 | 1.494705  |
| 22 | 6 | 0 | -2.902032 | 0.716462  | 2.268934  |
| 23 | 1 | 0 | -3.135656 | 1.727986  | 1.928522  |
| 24 | 1 | 0 | -1.844856 | 0.689751  | 2.548531  |
| 25 | 1 | 0 | -3.514498 | 0.474417  | 3.153287  |
| 26 | 6 | 0 | -1.739976 | -3.772872 | 1.132430  |
| 27 | 1 | 0 | -2.061616 | -4.076369 | 2.135586  |
| 28 | 1 | 0 | -0.717827 | -3.386638 | 1.216580  |
| 29 | 1 | 0 | -1.717710 | -4.669742 | 0.503121  |
| 30 | 6 | 0 | -4.063304 | -3.391004 | 0.338450  |
| 31 | 1 | 0 | -4.809854 | -2.711402 | -0.079123 |
| 32 | 1 | 0 | -4.451693 | -3.779381 | 1.286645  |
| 33 | 1 | 0 | -3.966326 | -4.237455 | -0.351698 |
| 34 | 7 | 0 | -3.143652 | -0.224295 | 1.166521  |
| 35 | 7 | 0 | -1.082749 | -1.293047 | -0.695328 |
| 36 | 8 | 0 | 0.043065  | 1.064983  | 0.247149  |
| 37 | 1 | 0 | 2.591971  | -2.476573 | -0.986152 |
| 38 | 6 | 0 | 2.335324  | 2.622289  | 0.906367  |
| 39 | 6 | 0 | 1.642013  | 3.537131  | -0.124410 |
| 40 | 6 | 0 | 1.559662  | 2.653344  | 2.239122  |
| 41 | 6 | 0 | 3.734506  | 3.199364  | 1.172309  |
| 42 | 1 | 0 | 2.195760  | 3.535352  | -1.070853 |
| 43 | 1 | 0 | 0.617927  | 3.212547  | -0.316244 |

|    |   |   |           |           |           |
|----|---|---|-----------|-----------|-----------|
| 44 | 1 | 0 | 1.616353  | 4.567845  | 0.250498  |
| 45 | 1 | 0 | 2.051405  | 2.017776  | 2.985445  |
| 46 | 1 | 0 | 1.531354  | 3.677434  | 2.631299  |
| 47 | 1 | 0 | 0.534343  | 2.306333  | 2.101406  |
| 48 | 1 | 0 | 3.634346  | 4.222228  | 1.551637  |
| 49 | 1 | 0 | 4.282751  | 2.621547  | 1.925962  |
| 50 | 1 | 0 | 4.340718  | 3.245671  | 0.259922  |
| 51 | 6 | 0 | 5.129216  | -1.389990 | -0.501183 |
| 52 | 6 | 0 | 5.857672  | -1.413908 | 0.856411  |
| 53 | 6 | 0 | 5.073211  | -2.826338 | -1.038790 |
| 54 | 6 | 0 | 5.934459  | -0.535312 | -1.498909 |
| 55 | 1 | 0 | 5.968447  | -0.408497 | 1.276149  |
| 56 | 1 | 0 | 5.304715  | -2.020754 | 1.581955  |
| 57 | 1 | 0 | 6.861964  | -1.840538 | 0.745266  |
| 58 | 1 | 0 | 4.587863  | -2.871831 | -2.020441 |
| 59 | 1 | 0 | 6.089630  | -3.219158 | -1.152991 |
| 60 | 1 | 0 | 4.535254  | -3.493222 | -0.355141 |
| 61 | 1 | 0 | 6.939526  | -0.952172 | -1.637028 |
| 62 | 1 | 0 | 5.436605  | -0.507067 | -2.474379 |
| 63 | 1 | 0 | 6.047610  | 0.496869  | -1.150901 |
| 64 | 6 | 0 | -3.253679 | 1.951696  | -1.557081 |
| 65 | 8 | 0 | -3.168277 | 0.761176  | -1.964393 |
| 66 | 8 | 0 | -2.539769 | 2.334263  | -0.573743 |
| 67 | 6 | 0 | -4.171393 | 2.938674  | -2.228970 |
| 68 | 1 | 0 | -4.623255 | 3.600474  | -1.486346 |
| 69 | 1 | 0 | -3.580974 | 3.558582  | -2.911953 |
| 70 | 1 | 0 | -4.940486 | 2.418868  | -2.802546 |

-----

**L<sup>3</sup>Cu(OAc)**

---

| Center<br>Number | Atomic<br>Number | Atomic<br>Type | Coordinates (Angstroms) |           |           |
|------------------|------------------|----------------|-------------------------|-----------|-----------|
|                  |                  |                | X                       | Y         | Z         |
| 1                | 29               | 0              | -1.574045               | 0.158826  | -0.787408 |
| 2                | 6                | 0              | -2.332064               | -1.882057 | 1.481865  |
| 3                | 1                | 0              | -2.792863               | -2.257147 | 2.409377  |
| 4                | 1                | 0              | -1.280845               | -1.679714 | 1.715692  |
| 5                | 6                | 0              | -2.393529               | -3.014417 | 0.447980  |
| 6                | 6                | 0              | -1.838040               | -2.677386 | -0.953718 |
| 7                | 1                | 0              | -1.426142               | -3.583981 | -1.417421 |
| 8                | 1                | 0              | -2.636221               | -2.306284 | -1.601701 |
| 9                | 6                | 0              | 0.420589                | -1.922418 | -0.736337 |
| 10               | 1                | 0              | 0.707989                | -2.978324 | -0.821958 |
| 11               | 6                | 0              | 1.482256                | -1.004387 | -0.448757 |
| 12               | 6                | 0              | 1.235691                | 0.359789  | -0.110196 |
| 13               | 6                | 0              | 2.369197                | 1.180434  | 0.226694  |
| 14               | 6                | 0              | 3.621081                | 0.603221  | 0.195046  |
| 15               | 1                | 0              | 4.473274                | 1.225691  | 0.444318  |
| 16               | 6                | 0              | 3.885348                | -0.748484 | -0.137511 |
| 17               | 6                | 0              | 2.798350                | -1.526052 | -0.447816 |
| 18               | 7                | 0              | -2.915161               | -0.608999 | 1.055484  |
| 19               | 7                | 0              | -0.829027               | -1.634718 | -0.879894 |
| 20               | 8                | 0              | 0.047646                | 0.876532  | -0.075903 |
| 21               | 1                | 0              | 2.921008                | -2.574483 | -0.706071 |
| 22               | 6                | 0              | 2.163921                | 2.656580  | 0.599929  |
| 23               | 6                | 0              | 1.514835                | 3.411457  | -0.578395 |
| 24               | 6                | 0              | 1.264509                | 2.764755  | 1.848453  |
| 25               | 6                | 0              | 3.492287                | 3.357486  | 0.925299  |



|    |   |   |           |           |           |
|----|---|---|-----------|-----------|-----------|
| 26 | 1 | 0 | 2.154407  | 3.356489  | -1.467343 |
| 27 | 1 | 0 | 0.536208  | 2.995390  | -0.823469 |
| 28 | 1 | 0 | 1.387414  | 4.469484  | -0.318014 |
| 29 | 1 | 0 | 1.714980  | 2.232773  | 2.695115  |
| 30 | 1 | 0 | 1.146429  | 3.817471  | 2.133321  |
| 31 | 1 | 0 | 0.275774  | 2.346016  | 1.654342  |
| 32 | 1 | 0 | 3.291997  | 4.402867  | 1.184446  |
| 33 | 1 | 0 | 4.002151  | 2.898467  | 1.780721  |
| 34 | 1 | 0 | 4.178021  | 3.357417  | 0.069851  |
| 35 | 6 | 0 | 5.329101  | -1.259464 | -0.130475 |
| 36 | 6 | 0 | 5.930394  | -1.089415 | 1.278016  |
| 37 | 6 | 0 | 5.415639  | -2.743750 | -0.510896 |
| 38 | 6 | 0 | 6.165029  | -0.454693 | -1.144331 |
| 39 | 1 | 0 | 5.937467  | -0.040708 | 1.593363  |
| 40 | 1 | 0 | 5.353809  | -1.657417 | 2.016491  |
| 41 | 1 | 0 | 6.966024  | -1.449929 | 1.298777  |
| 42 | 1 | 0 | 5.026324  | -2.925975 | -1.519095 |
| 43 | 1 | 0 | 6.461534  | -3.069756 | -0.495508 |
| 44 | 1 | 0 | 4.861623  | -3.374699 | 0.193710  |
| 45 | 1 | 0 | 7.203470  | -0.807636 | -1.151028 |
| 46 | 1 | 0 | 5.757846  | -0.564317 | -2.155452 |
| 47 | 1 | 0 | 6.178514  | 0.613409  | -0.902912 |
| 48 | 6 | 0 | -3.343001 | 1.279749  | -1.927678 |
| 49 | 8 | 0 | -3.128292 | 0.060135  | -2.191647 |
| 50 | 8 | 0 | -2.617054 | 1.863124  | -1.065000 |
| 51 | 6 | 0 | -4.425859 | 2.040785  | -2.642631 |
| 52 | 1 | 0 | -4.814947 | 2.837257  | -2.005324 |
| 53 | 1 | 0 | -3.997527 | 2.500300  | -3.539852 |
| 54 | 1 | 0 | -5.225550 | 1.365051  | -2.951769 |
| 55 | 6 | 0 | -4.330938 | -0.688622 | 0.664290  |

|    |   |   |           |           |           |
|----|---|---|-----------|-----------|-----------|
| 56 | 6 | 0 | -5.295559 | -1.418412 | 1.605815  |
| 57 | 1 | 0 | -4.375975 | -1.162109 | -0.322430 |
| 58 | 1 | 0 | -4.668958 | 0.342691  | 0.516021  |
| 59 | 1 | 0 | -6.304993 | -1.373462 | 1.183211  |
| 60 | 1 | 0 | -5.037164 | -2.476702 | 1.716682  |
| 61 | 1 | 0 | -5.330006 | -0.977299 | 2.604310  |
| 62 | 6 | 0 | -2.584971 | 0.496095  | 1.975397  |
| 63 | 6 | 0 | -3.160618 | 0.458855  | 3.393903  |
| 64 | 1 | 0 | -2.890424 | 1.422874  | 1.477898  |
| 65 | 1 | 0 | -1.490770 | 0.530527  | 2.032532  |
| 66 | 1 | 0 | -2.683320 | 1.243159  | 3.990907  |
| 67 | 1 | 0 | -4.237650 | 0.648923  | 3.406816  |
| 68 | 1 | 0 | -2.972063 | -0.497133 | 3.893731  |
| 69 | 1 | 0 | -1.815305 | -3.842331 | 0.876164  |
| 70 | 1 | 0 | -3.419202 | -3.382991 | 0.334005  |

-----
